# Supplementary material for: IMMPACT-recommended outcome measures and tools of assessment in burning mouth syndrome RCTs: an international Delphi survey protocol
Source: PubMed Central journal article supplement (PMC7425408; doi:10.1186/s13063-020-04640-4), 2020-08-12
Supplement: 13063_2020_4640_MOESM1_ESM.pdf [file 13063_2020_4640_MOESM1_ESM.pdf]

# Core Outcome Set-STANDARDISED Protocol Items: the COS-STAP Statement

|                           |    |                                                                                                                                                                         |                      |
|---------------------------|----|-------------------------------------------------------------------------------------------------------------------------------------------------------------------------|----------------------|
| TITLE/ABSTRACT            |    |                                                                                                                                                                         |                      |
| Title                     | 1a | Identify in the title that the paper describes the protocol for the planned development of a COS                                                                        | Complete<br>P.1      |
| Abstract                  | 1b | Provide a structured abstract                                                                                                                                           | Complete<br>P. 3-4   |
| INTRODUCTION              |    |                                                                                                                                                                         |                      |
| Background and objectives | 2a | Describe the background and explain the rationale for developing the COS, and identify the reasons why a COS is needed and the potential barriers to its implementation | Complete<br>P. 5,6,7 |
|                           | 2b | Describe the specific objectives with reference to developing a COS                                                                                                     | Complete<br>P. 9     |
| Scope                     | 3a | Describe the health condition(s) and population(s) that will be covered by the COS                                                                                      | Complete<br>P. 9     |
|                           | 3b | Describe the intervention(s) that will be covered by the COS                                                                                                            | Complete<br>P. 9     |
|                           | 3c | Describe the context of use for which the COS is to be applied                                                                                                          | Complete<br>P. 9,10  |
| METHODS                   |    |                                                                                                                                                                         |                      |
| Stakeholders              | 4  | Describe the stakeholder groups to be involved in the COS development process, the nature of and rationale for their involvement and also how the                       | Complete<br>P. 9, 11 |

# Core Outcome Set-STANDARDISED Protocol Items: the COS-STAP Statement

|                          |    |                                                                                                                                              |                           |
|--------------------------|----|----------------------------------------------------------------------------------------------------------------------------------------------|---------------------------|
|                          |    | individuals will be identified; this should cover involvement both as members of the research team and as participants in the study          |                           |
| Information sources      | 5a | Describe the information sources that will be used to identify the list of outcomes. Outline the methods or reference other protocols/papers | Complete<br>P11, 12       |
|                          | 5b | Describe how outcomes may be dropped/combined, with reasons                                                                                  | Complete<br>P 11,12,13,14 |
| Consensus process        | 6  | Describe the plans for how the consensus process will be undertaken                                                                          | Complete<br>P 8           |
| Consensus definition     | 7a | Describe the consensus definition                                                                                                            | Complete<br>P12,13,16     |
|                          | 7b | Describe the procedure for determining how outcomes will be added/combined/dropped from consideration during the consensus process           | Complete<br>P12,13,14     |
| ANALYSIS                 |    |                                                                                                                                              |                           |
| Outcome scoring/feedback | 8  | Describe how outcomes will be scored and summarised, describe how participants will receive feedback during the consensus process            | Complete<br>P 12,13,14    |
| Missing data             | 9  | Describe how missing data will be handled during the consensus process                                                                       | Complete<br>P11           |
| ETHICS and DISSEMINATION |    |                                                                                                                                              |                           |

# Core Outcome Set-STANDARDISED Protocol Items: the COS-STAP Statement

|                                  |    |                                                                                                                                                                                                      |                 |
|----------------------------------|----|------------------------------------------------------------------------------------------------------------------------------------------------------------------------------------------------------|-----------------|
| Ethics approval/informed consent | 10 | Describe any plans for obtaining research ethics committee/institutional review board approval in relation to the consensus process and describe how informed consent will be obtained (if relevant) | Complete<br>P12 |
| Dissemination                    | 11 | Describe any plans to communicate the results to study participants and COS users, inclusive of methods and timing of dissemination                                                                  | Complete<br>P15 |
| ADMINISTRATIVE INFORMATION       |    |                                                                                                                                                                                                      |                 |
| Funders                          | 12 | Describe sources of funding, role of funders                                                                                                                                                         | Complete<br>P17 |
| Conflicts of interest            | 13 | Describe any potential conflicts of interest within the study team and how they will be managed                                                                                                      | Complete<br>P17 |
